# Supplementary material
Source: publisher site journal article supplement (https://www.spandidos-publications.com/2084/downloadSupplementary)

Figure S1. MTT assay was used to detect the proliferative ability of PD-treated SGC-996 cells after 24, 48 and 72 h.

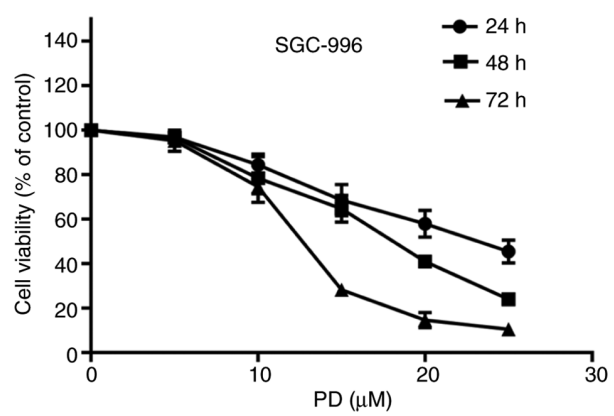

Supplement: Supplementary file 1 [file downloadSupplementary]
